# Supplementary material for: Methodology to Create Reproducible Validation/Reference Materials for Comparison of Filter-Based Measurements of Carbonaceous Aerosols That Measure BC, BrC, EC, OC, and TC
Source: MDPI journal article supplement (doi:10.3390/metrology1020010), 2021-11-26
Supplement: s1 [file s1]

Archive with 1 entries (1 files):
- metrology-1345500-supplementary.pdf
